# Supplementary material for: Multi-omics landscapes of colorectal cancer subtypes discriminated by an individualized prognostic signature for 5-fluorouracil-based chemotherapy
Source: PubMed Central journal article supplement (PMC5399173; doi:10.1038/oncsis.2016.51), 2016-07-18
Supplement: oncsis201651x2.pdf [file oncsis201651x2.pdf]

|              |    |    |    |   |    |   |   |   |   |   |   |   |
|--------------|----|----|----|---|----|---|---|---|---|---|---|---|
| TCGA-AM-5821 | 8  | 11 | 6  | 2 | 5  | 0 | 1 | 0 | 1 | 0 | 1 | 0 |
| TCGA-F4-6704 | 11 | 15 | 15 | 8 | 17 | 4 | 1 | 2 | 0 | 1 | 1 | 0 |
| TCGA-DM-A0X9 | 5  | 5  | 3  | 2 | 3  | 0 | 1 | 0 | 1 | 0 | 0 | 0 |
| TCGA-CM-6167 | 6  | 8  | 8  | 4 | 9  | 2 | 2 | 2 | 1 | 1 | 0 | 0 |
| TCGA-G4-6298 | 10 | 10 | 10 | 5 | 12 | 3 | 2 | 2 | 0 | 1 | 1 | 0 |
| TCGA-NH-A6GA | 8  | 9  | 10 | 5 | 12 | 3 | 2 | 2 | 0 | 2 | 1 | 0 |
| TCGA-D5-5541 | 7  | 10 | 8  | 6 | 9  | 3 | 2 | 2 | 1 | 1 | 0 | 0 |
| TCGA-CA-6716 | 10 | 16 | 15 | 7 | 15 | 1 | 0 | 1 | 1 | 2 | 1 | 0 |
| TCGA-A6-A565 | 1  | 2  | 4  | 3 | 5  | 2 | 1 | 2 | 0 | 1 | 0 | 0 |
| TCGA-CM-6679 | 14 | 20 | 18 | 9 | 19 | 3 | 2 | 3 | 2 | 2 | 1 | 0 |
| TCGA-A6-2685 | 10 | 12 | 11 | 5 | 13 | 3 | 2 | 2 | 0 | 1 | 1 | 0 |
| TCGA-G4-6311 | 7  | 10 | 8  | 6 | 9  | 3 | 2 | 2 | 1 | 1 | 0 | 0 |
| TCGA-D5-5539 | 6  | 12 | 9  | 7 | 11 | 3 | 1 | 2 | 0 | 1 | 0 | 0 |
| TCGA-CM-6162 | 0  | 0  | 0  | 0 | 0  | 0 | 0 | 0 | 0 | 0 | 0 | 0 |
| TCGA-CM-5349 | 8  | 10 | 4  | 5 | 6  | 2 | 1 | 0 | 1 | 0 | 0 | 0 |
| TCGA-AA-3496 | 6  | 7  | 8  | 4 | 9  | 2 | 2 | 2 | 1 | 1 | 0 | 0 |
| TCGA-D5-6539 | 7  | 10 | 7  | 8 | 11 | 3 | 1 | 2 | 0 | 1 | 0 | 0 |
| TCGA-CM-6169 | 14 | 26 | 15 | 8 | 15 | 3 | 1 | 1 | 2 | 1 | 1 | 0 |
| TCGA-AZ-5403 | 11 | 13 | 14 | 6 | 12 | 3 | 2 | 2 | 2 | 1 | 0 | 0 |
| TCGA-G4-6302 | 3  | 3  | 1  | 0 | 0  | 0 | 1 | 0 | 1 | 0 | 0 | 0 |
| TCGA-CA-6719 | 10 | 15 | 12 | 7 | 14 | 5 | 2 | 2 | 2 | 1 | 0 | 0 |
| TCGA-D5-6922 | 11 | 15 | 14 | 8 | 12 | 4 | 2 | 2 | 2 | 1 | 0 | 0 |
| TCGA-CA-6717 | 0  | 0  | 0  | 0 | 0  | 0 | 0 | 0 | 0 | 0 | 0 | 0 |
| TCGA-D5-6541 | 6  | 4  | 1  | 1 | 0  | 0 | 1 | 0 | 1 | 0 | 0 | 0 |
| TCGA-A6-6781 | 0  | 0  | 0  | 0 | 0  | 0 | 0 | 0 | 0 | 0 | 0 | 0 |
| TCGA-DM-A28G | 3  | 2  | 0  | 0 | 0  | 0 | 1 | 0 | 0 | 0 | 0 | 0 |
| TCGA-AY-A69D | 10 | 15 | 13 | 6 | 14 | 2 | 0 | 1 | 1 | 1 | 1 | 0 |
